# Supplementary material
Source: publisher figshare collection journal article supplement (https://diabetesjournals.figshare.com/articles/dataset/_/21171184)

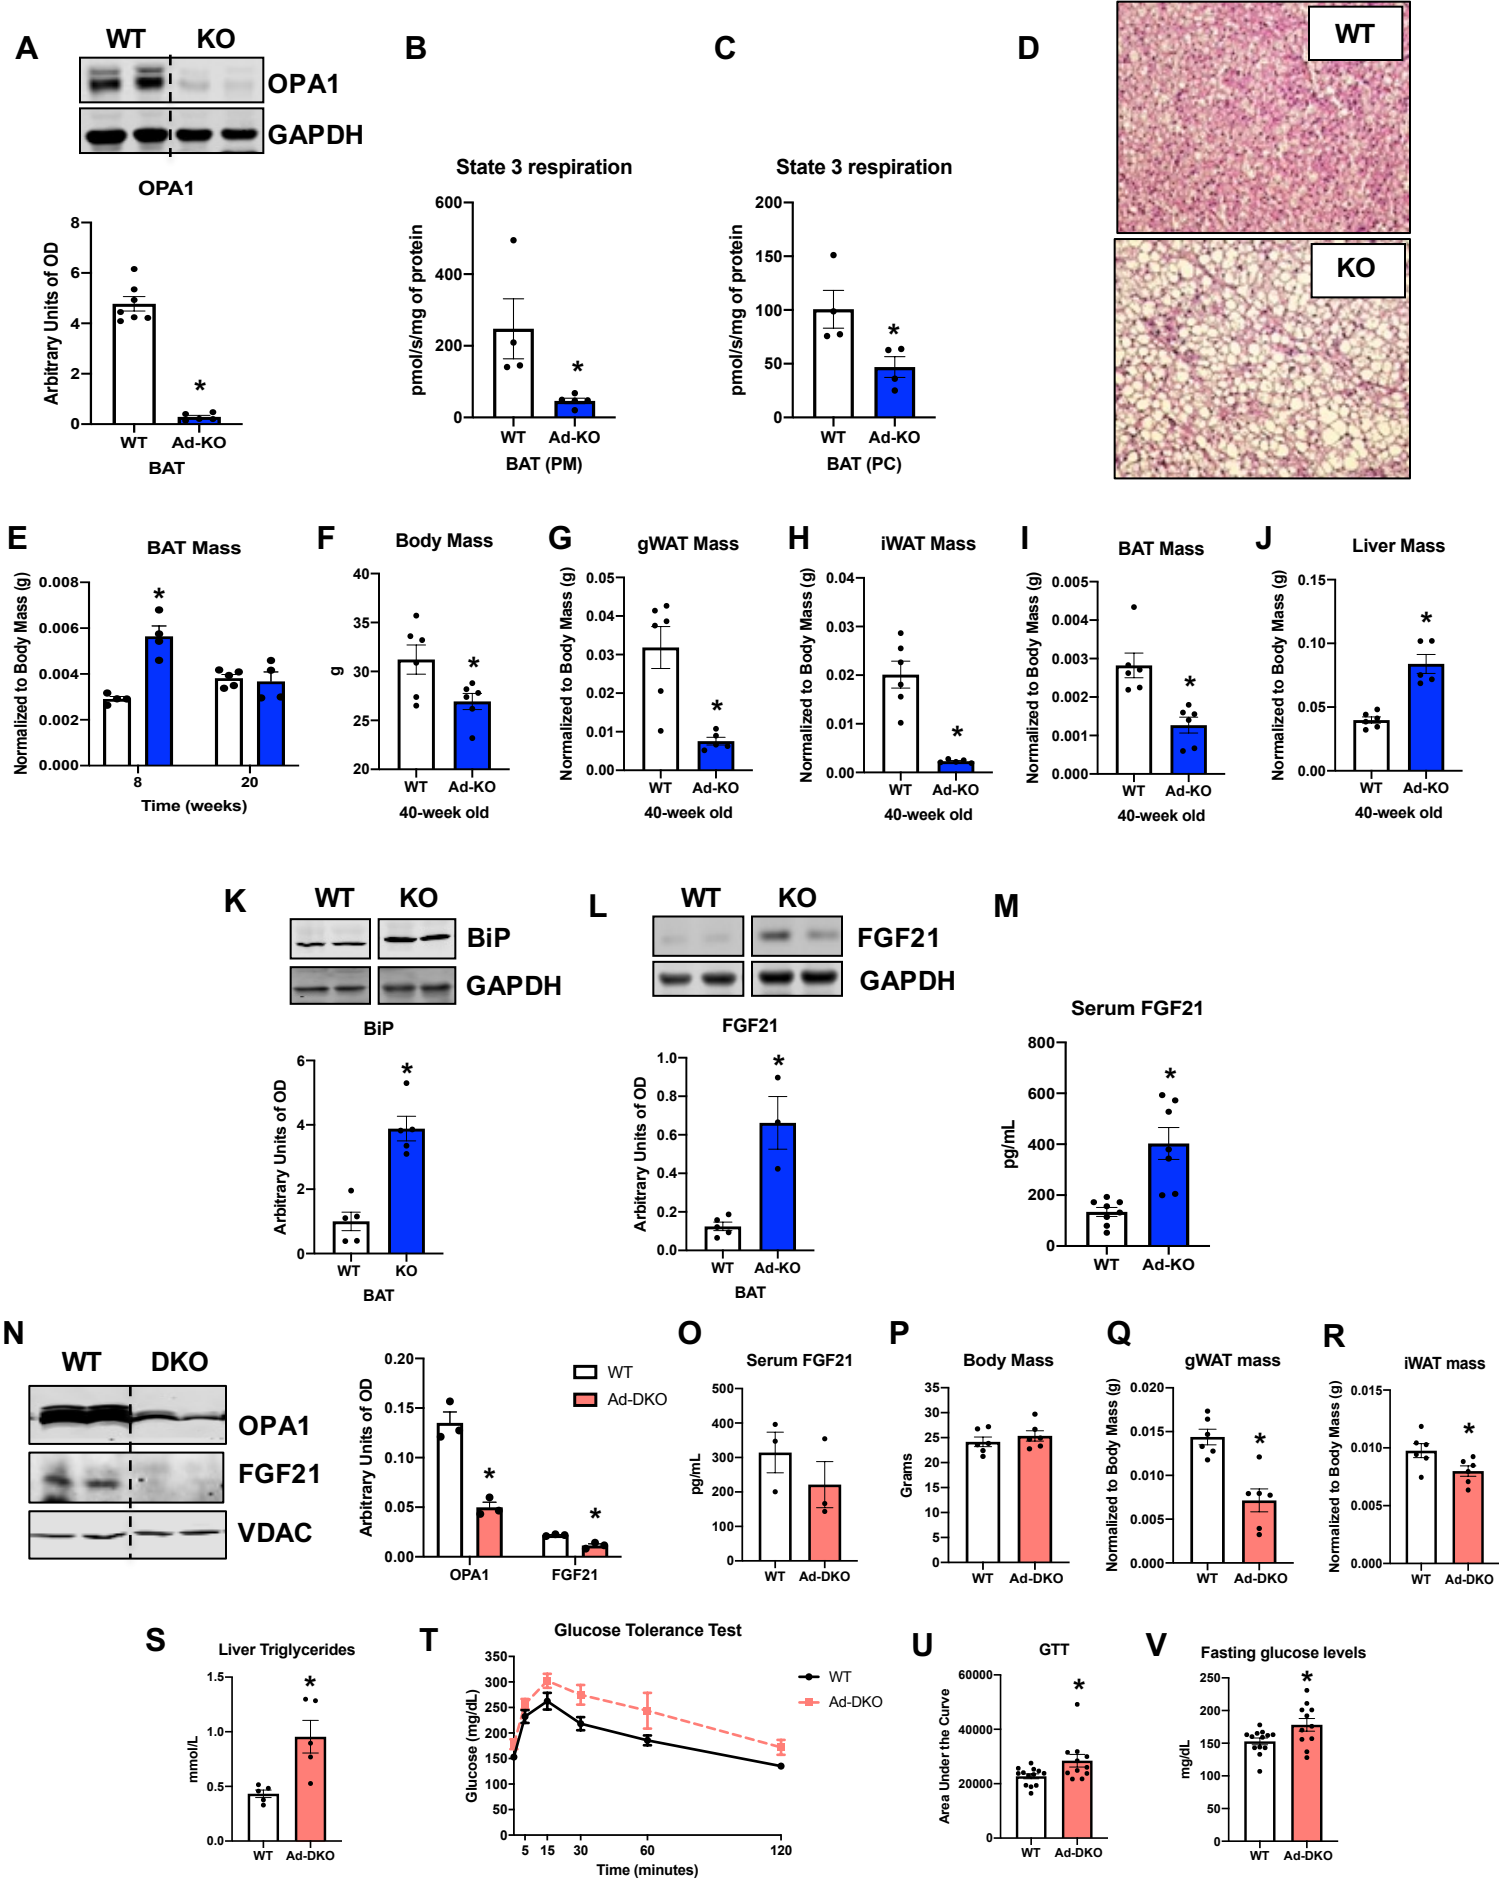

Supplement: Supplementary file 1 [file 1]

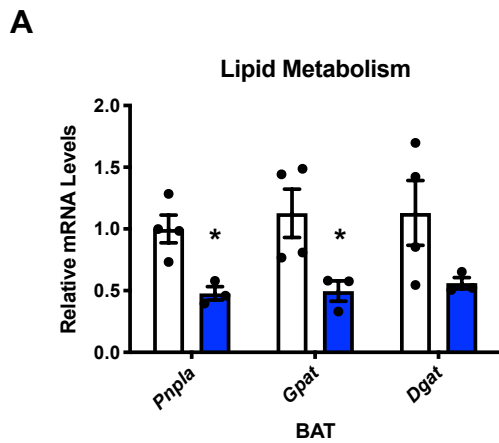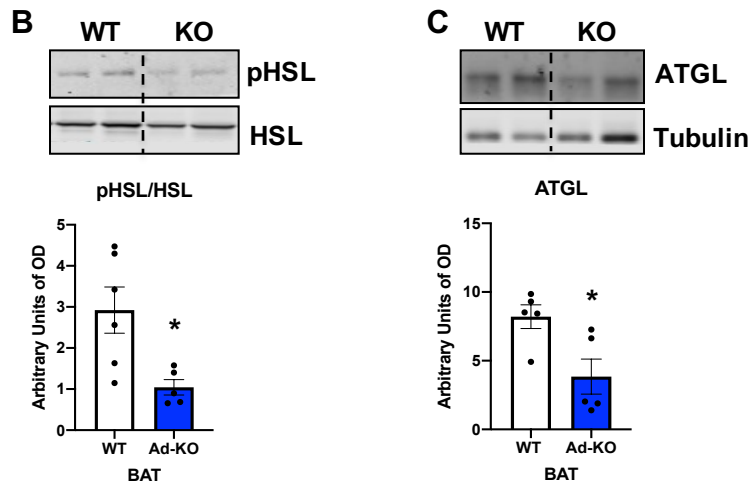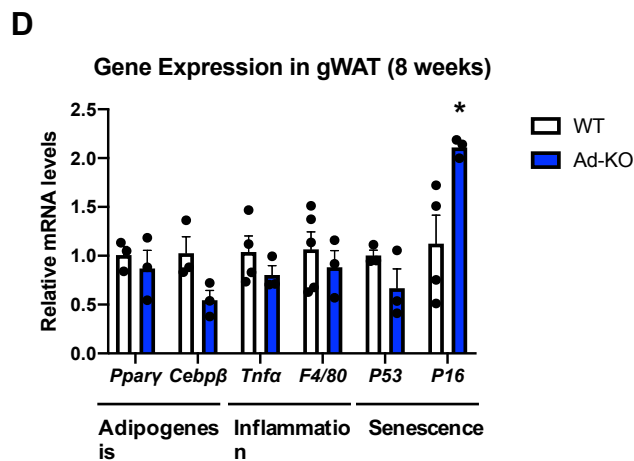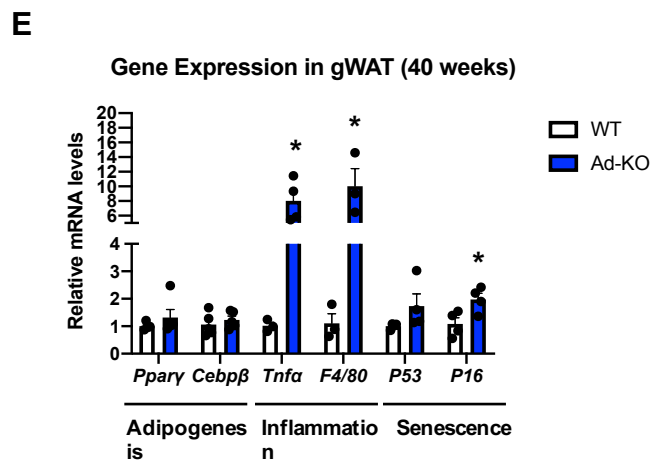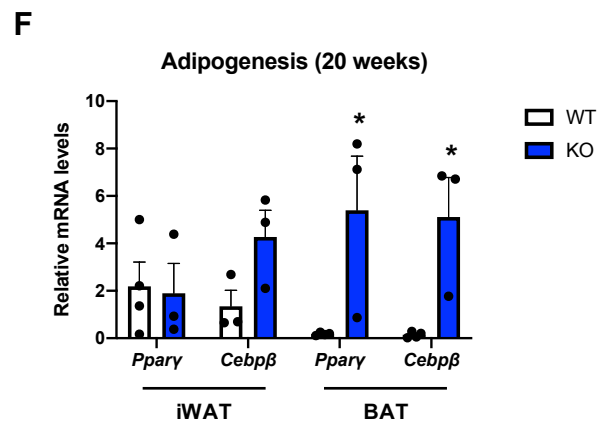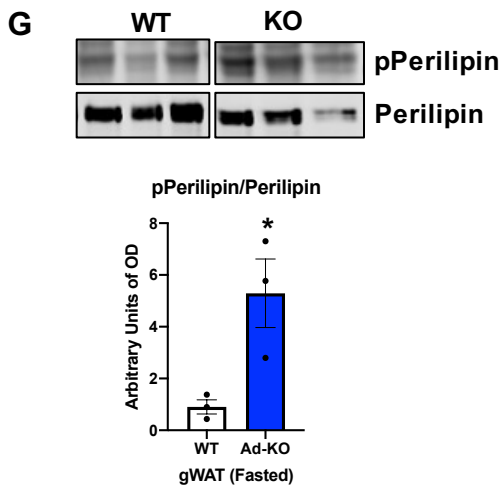

Supplement: Supplementary file 3 [file 1]

**A**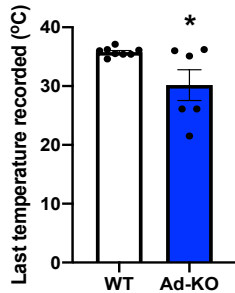**B**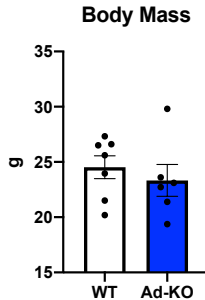**C**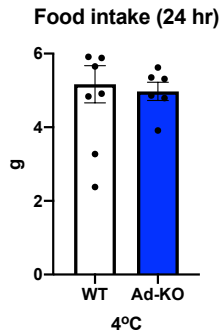**D**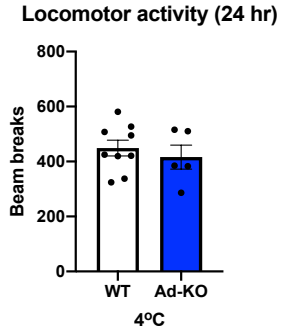

Supplement: Supplementary file 4 [file 1]

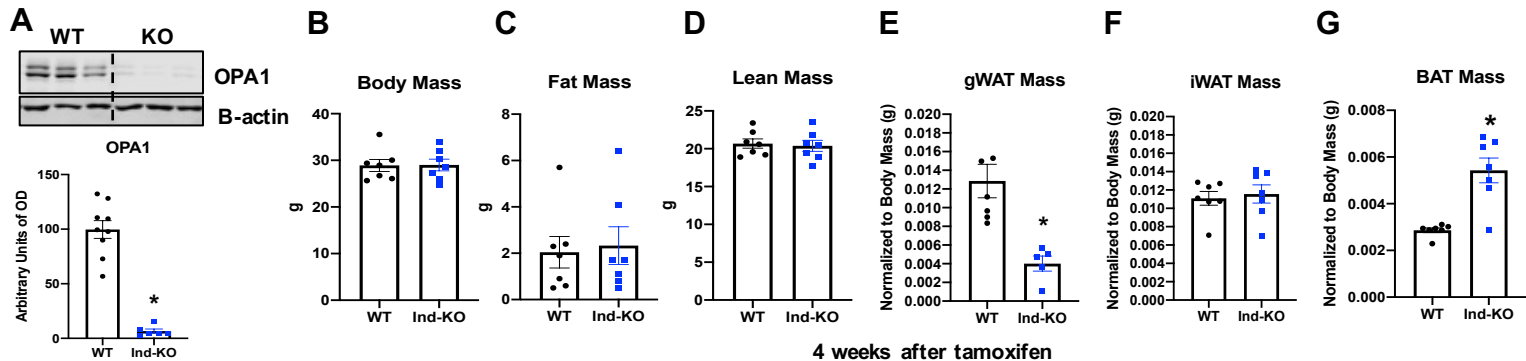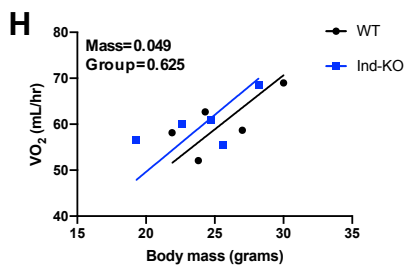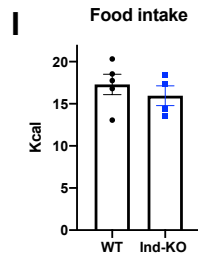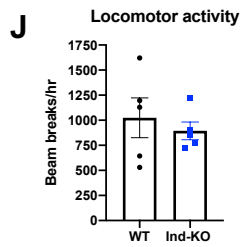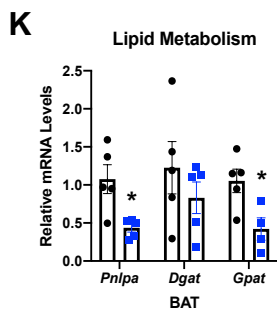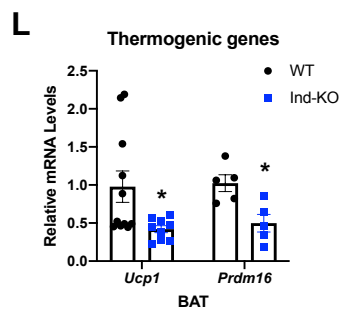

Supplement: Supplementary file 5 [file 1]

**A****Body Mass**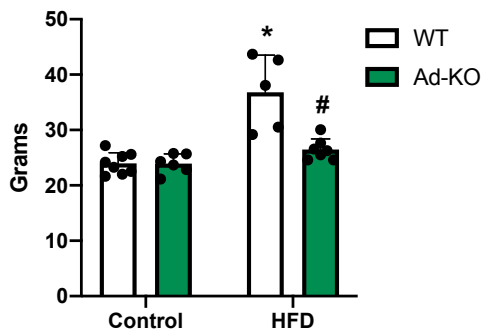**B****Fat Mass**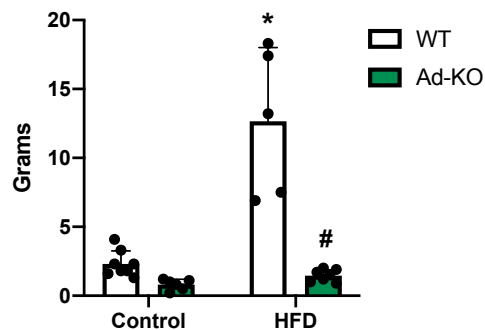**C****Lean Mass**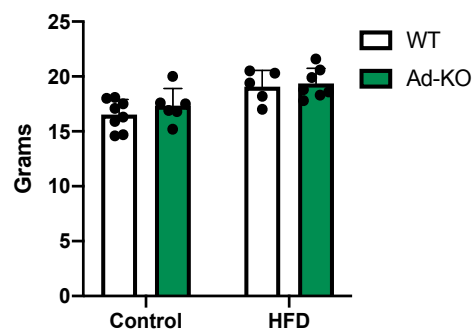**D****Body Mass**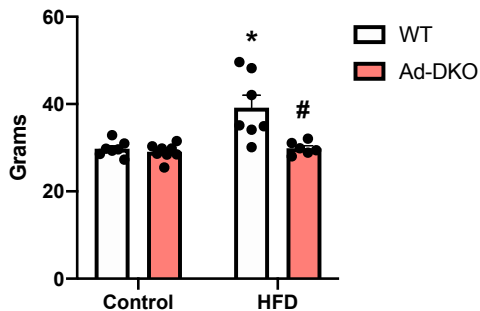**E****Fat Mass**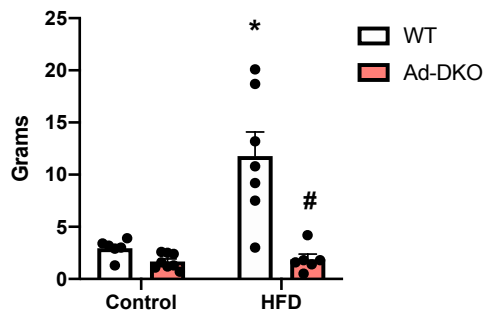**F****Lean Mass**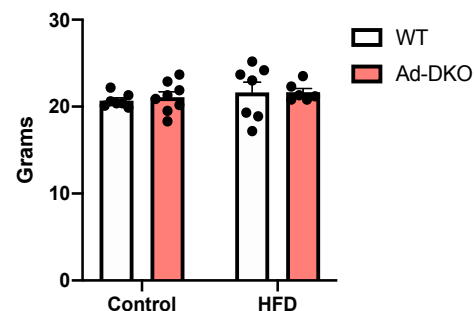**G****Glucose Tolerance Test**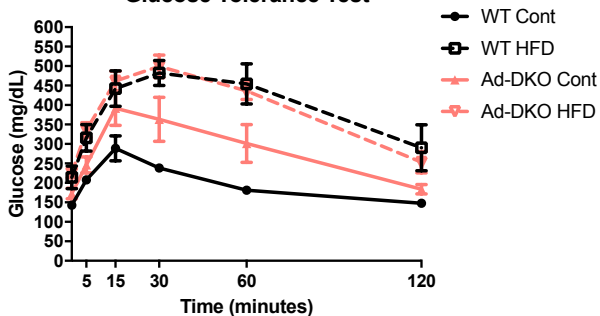**H**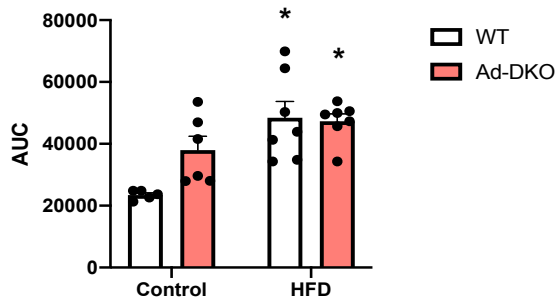

Supplement: Supplementary file 6 [file 1]
